# Supplementary material
Source: PubMed Central journal article supplement (PMC5578400)
Supplement: NIHMS890727-supplement-supplement_1.pdf [file NIHMS890727-supplement-supplement_1.pdf]

Figure 1S

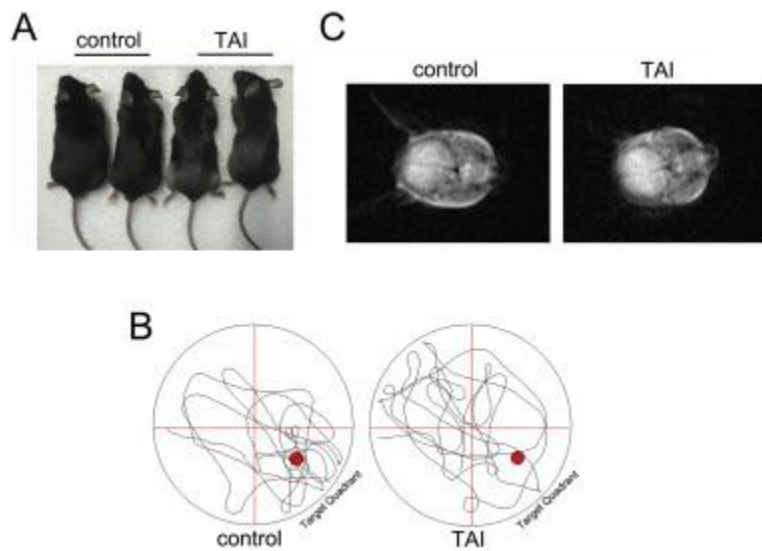

**Figure S1. Total abdominal irradiation induces cognitive deficits in the mice.**

(A) The mice exposed to 10 Gy TAI (right) along with mice without irradiation (left). Note the body size. (B) The tracks in target quadrant and swimming traces in 60 s at day 6 of Morris water maze were shown. (C) NMR brain images of mice with or without TAI exposure.

Figure S2

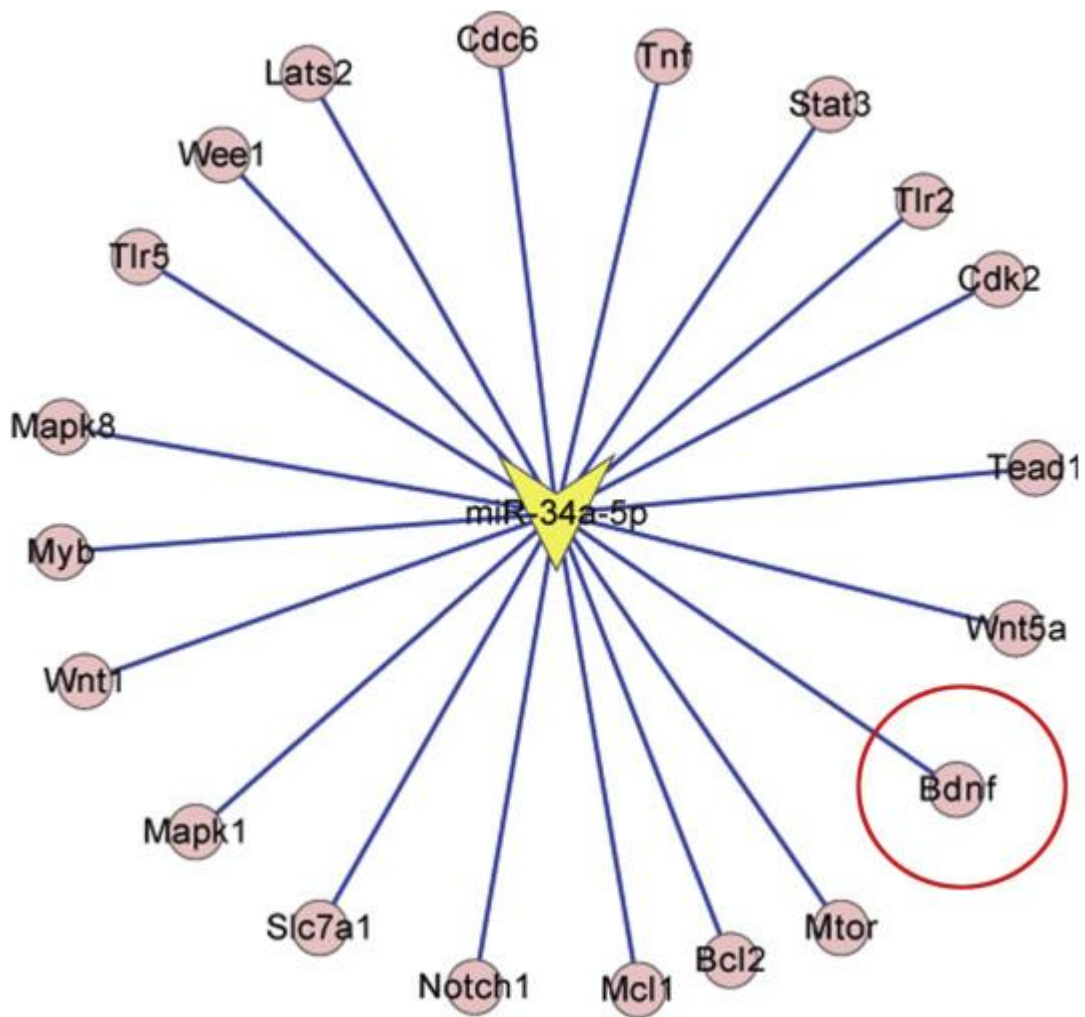

Figure S2. The target genes of miR-34a-5p are predicted by bioinformatics tools.

Figure S3

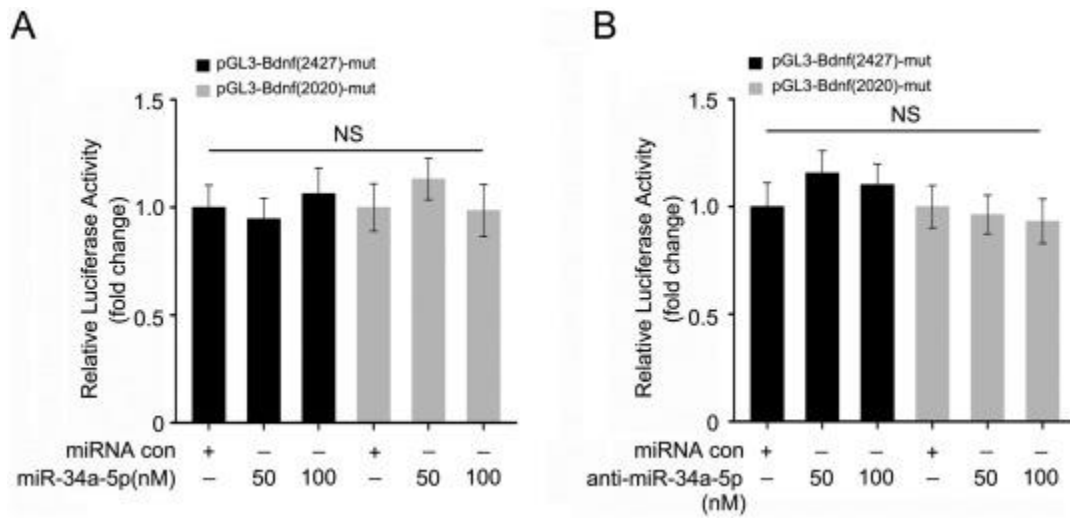

**Figure S3. miR-34a-5p modulates the expression of *Bdnf* via targeting its 3'UTR.**

(A, B) The effect of miR-34a-5p (or anti-miR-34a-5p) on the pGL3-Bdnf-2427-mut and pGL3-Bdnf-2020-mut reporters in 3T3 cells were measured by luciferase reporter assays. Each experiment was repeated at least three times. Statistically significant differences are indicated: NS, no significant; Student *t*-test.

Figure S4

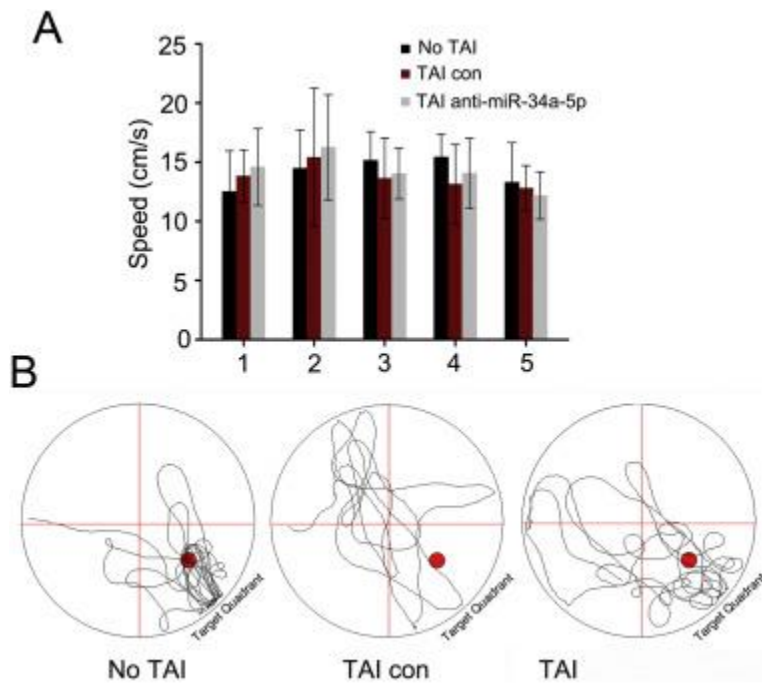

Figure S4. The swimming speed during the 5 days of Morris water maze test. (A) The mice were treated with TAI in the absence or presence of miRNA-34a-5p antagomir.  $n = 12$  mice/group. (B) The tracks in target quadrant and swimming traces in 60 s at day 6 of Morris water maze were shown.

Figure S5

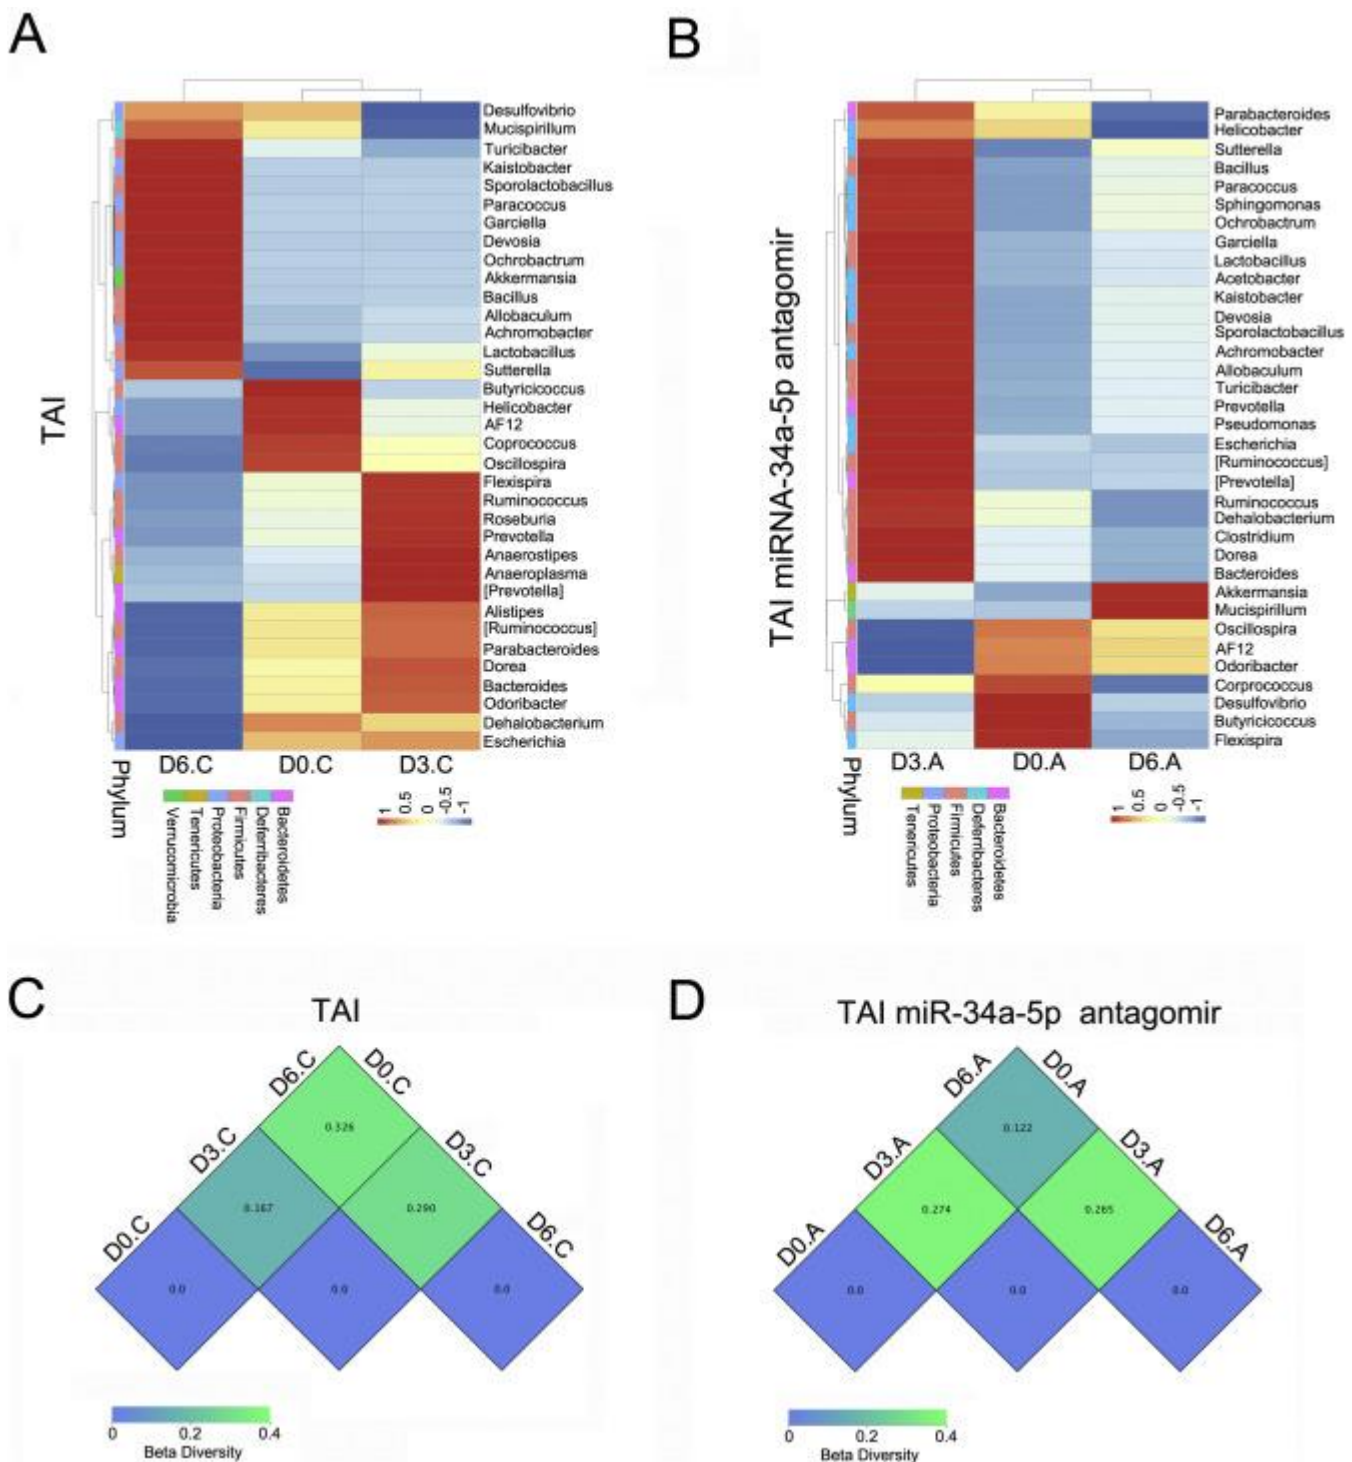

**Figure S5. Tail intravenous injection of miRNA-34a-5p antagomir reestablishes the intestinal bacterial composition after TAI.** (A) The alteration of intestinal bacterial patterns in TAI treated mice was assessed using 16S high throughput sequencing after radiation at day 5 and day 10,  $n = 5$ . (B) The difference of intestinal bacterial structure in phylum level of mice on the day before TAI, three days and six days after TAI was performed using 16S high throughput sequencing,  $n = 5$ . (C, D) The shift of intestinal bacterial flora profile in above two cohorts was assessed using 16S rRNA sequencing.

Figure S6

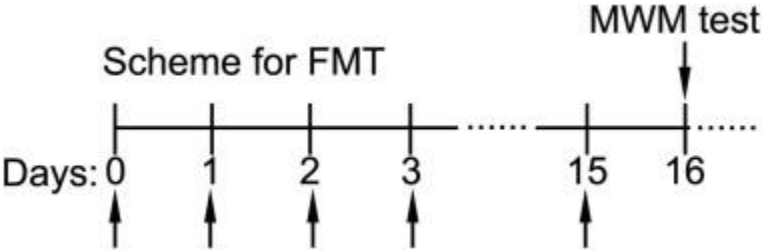

Figure S6. The scheme for FMT.

**Supplementary Table 1.** List of primers used in this paper.

| <b>Gene</b>                   | <b>Primer</b> | <b>Sequence (5'-3')</b>                  |
|-------------------------------|---------------|------------------------------------------|
| <b>Primers for PCR</b>        |               |                                          |
| <i>Bdnf</i>                   | forward       | GTCACAGCGGCAGATAAAA                      |
|                               | reverse       | GATTGGGTAGTTCGGCATTG                     |
| <i>IL-6</i>                   | forward       | TGTGCAATGGCAATTCTGAT                     |
|                               | reverse       | GGTACTCCAGAAGACCAGAGGA                   |
| <i>MyD88</i>                  | forward       | CCCACTCGCAGTTTGTGGGA                     |
|                               | reverse       | GATGCCTCCAGTTCCTTTG                      |
| <i>GAPDH</i>                  | forward       | TGTTTCCTCGTCCCCTAGA                      |
|                               | reverse       | CAATCTCCACTTTGCCACTG                     |
| miR-34a-5p                    | forward       | TGGCAGTGTCTTAGCTGGTTGT                   |
|                               | reverse       | GCGAGCACAGAATTAATACGAC                   |
| U6                            | forward       | AGAGCCTGTGGTGTCCG                        |
|                               | reverse       | CATCTTCAAAGCACTTCCCT                     |
| <b>Primers for clone</b>      |               |                                          |
| pGL3- <i>Bdnf</i> (2427)      | forward       | CTAGTCTAGAGGCCTAACAGTGTTTGCAGA           |
|                               | reverse       | GGGGGCCGGCCTGTTAGGTAATGTAGGCACT          |
| pGL3- <i>Bdnf</i> (2020)      | forward       | CTAGTCTAGACCGGAGTAGGGATGGAGAAA           |
|                               | reverse       | GGGGGCCGGCCAATGACACACATTGTTTCATC         |
| pGL3- <i>Bdnf</i> (2427)-mut  | forward       | CTTAGATAAGTGGTCGGTTCCTGTGACGGATTGAAATAGG |
|                               | reverse       | CCTATTTCAATCCGTCACAGGAACCGACCACTTATCTAAG |
| pGL3- <i>Bdnf</i> (2020)-mut  | forward       | CTGAATTTAATCGA CACTCGTGAGGGATGATGTATCT   |
|                               | reverse       | AGATACATCATCCCGTCACGAGTGTGTCGATTAAATTCAG |
| <b>Primers for sequencing</b> |               |                                          |
| 515F                          |               | GTGCCAGCMGCCGCGGTAA                      |
| 806R                          |               | GGACTACHVGGGTWTCTAAT                     |
